# Supplementary material for: RBM10 Interacts with CTBNNBIP1 and Represses Lung Adenocarcinoma Progression Through the Wnt/β- catenin Pathway
Source: Research Square preprint supplement (doi:10.21203/rs.3.rs-480093/v1), 2021-05-07
Supplement: Supplementary file 1 [file 910a44046ae9ee86c07fafc4.docx]

Supplementary Information for

**RBM10 interacts with CTBNNBIP1 and represses lung adenocarcinoma progression through the Wnt/β- catenin pathway**

Correspondence: Yan Yu, Email: [**yuyan@hrbmu.edu.cn**](mailto:yuyan@hrbmu.edu.cn)**;**

Bo Pan, Email: **panbo1291@126.com**

**This file includes:**

Supplementary Tables

**Additional file 1: table S1 to Additional file 2: table S2**

Supplementary Figures

**Additional file 1 to Additional file 5**

**Additional file 1: Table S1 Primers sequences**

| GENE | Forward (5’to 3’) | Reverse (5’to 3’) |
| --- | --- | --- |
| RBM10 | GCACGACTATAGGCATGACAT | AGTCAAACTTGTCTGCTCCA |
| E-cadherin | GCTGGACCGAGAGAGTTTCC | CAAAATCCAAGCCCGTGGTG |
| Vimentin | CGGGAGAAATTGCAGGAGGA | AAGGTCAAGACGTGCCAGAG |
| Slug | TCCTGGTCAAGAAGCATTTCAA | TTGTGGTATGACAGGCATGGA |
| Twist | GCCAGGTACATCGACTTCCTCT | TCCATCCTCCAGACCGAGAAGG |
| c-MYC | AGCGACTCTGAGGAGGAAC | TGTGAGGAGGTTTGCTGTG |
| cyclinD1 | GATCAAGTGTGACCCGGACT | CTTGGGGTCCATGTTCTGCT |
| β-catenin | AAAGCGGCTGTTAGTCACTGG | CGAGTCATTGCATACTGTCCAT |
| TCF3 | CTCGAGAAGAACAGGCCAAG | GGGGCAGGTACTGAACACAT |
| TCF4 | GATGCTCTGGGGAAAGCACT | GTGCCTGCTGAGAGAGATGG |
| LEF1 | AGAACACCCGGATGACGGA | GGCATCATTATGTACCCGGAAT |
| MMP7 | AAATGCCAACAGTTTAGAAGCC | ATTATTTCTATGACGCGGGAGT |
| MMP3 | GGTGTGGAGTTCCTGATGTTGGTC | AGCCTGGAGAATGTGAGTGGAGTC |
| MMP10 | CAGCGGACAAATACTGGAGAT | CTTAGGCTCAACTCCTGGAAAG |
| CTNNBIP1 | GGAAGAGTCCGGAGGAGATG | CTCTGCACCCTGGTCGAT |
| GAPDH | GACTCATGACCACAGTCCATGC | AGAGGCAGGGATGATGTTCTG |

**Additional file 2: Table S2 Primers antibody**

| Antibody | Manufacturer | Diluted |
| --- | --- | --- |
| RBM10 | Abcam, Ab72423 | 1:1000 |
| E-cadherin | Proteintech, 20874-1-AP | 1:1000 |
| Vimentin | Proteintech, 10366-1-AP | 1:1000 |
| Slug | Cell signaling technology, #9585 | 1:1000 |
| Twist | Cell signaling technology, #69366 | 1:1000 |
| N-cadherin | Cell signaling technology, #13116 | 1:1000 |
| EPCAM | ABclonal, A1177 | 1:500 |
| β-catenin | Abcam, Ab32572 | 1:5000 |
| c-MYC | Abways, CY5150 | 1:5000 |
| cyclinD1 | Abways, CY5404 | 1:1000 |
| MMP7 | Abways, CY1224 | 1:500 |
| TCF3 | Cell signaling technology, #2883 | 1:1000 |
| TCF4 | Cell signaling technology, #2569 | 1:1000 |
| LEF1 | Cell signaling technology, #2203 | 1:1000 |
| CTNNBIP1 | Abcam, Ab129011 | 1:1000 |
| β-actin | Proteintech, 66009-1-Ig | 1:10000 |

**
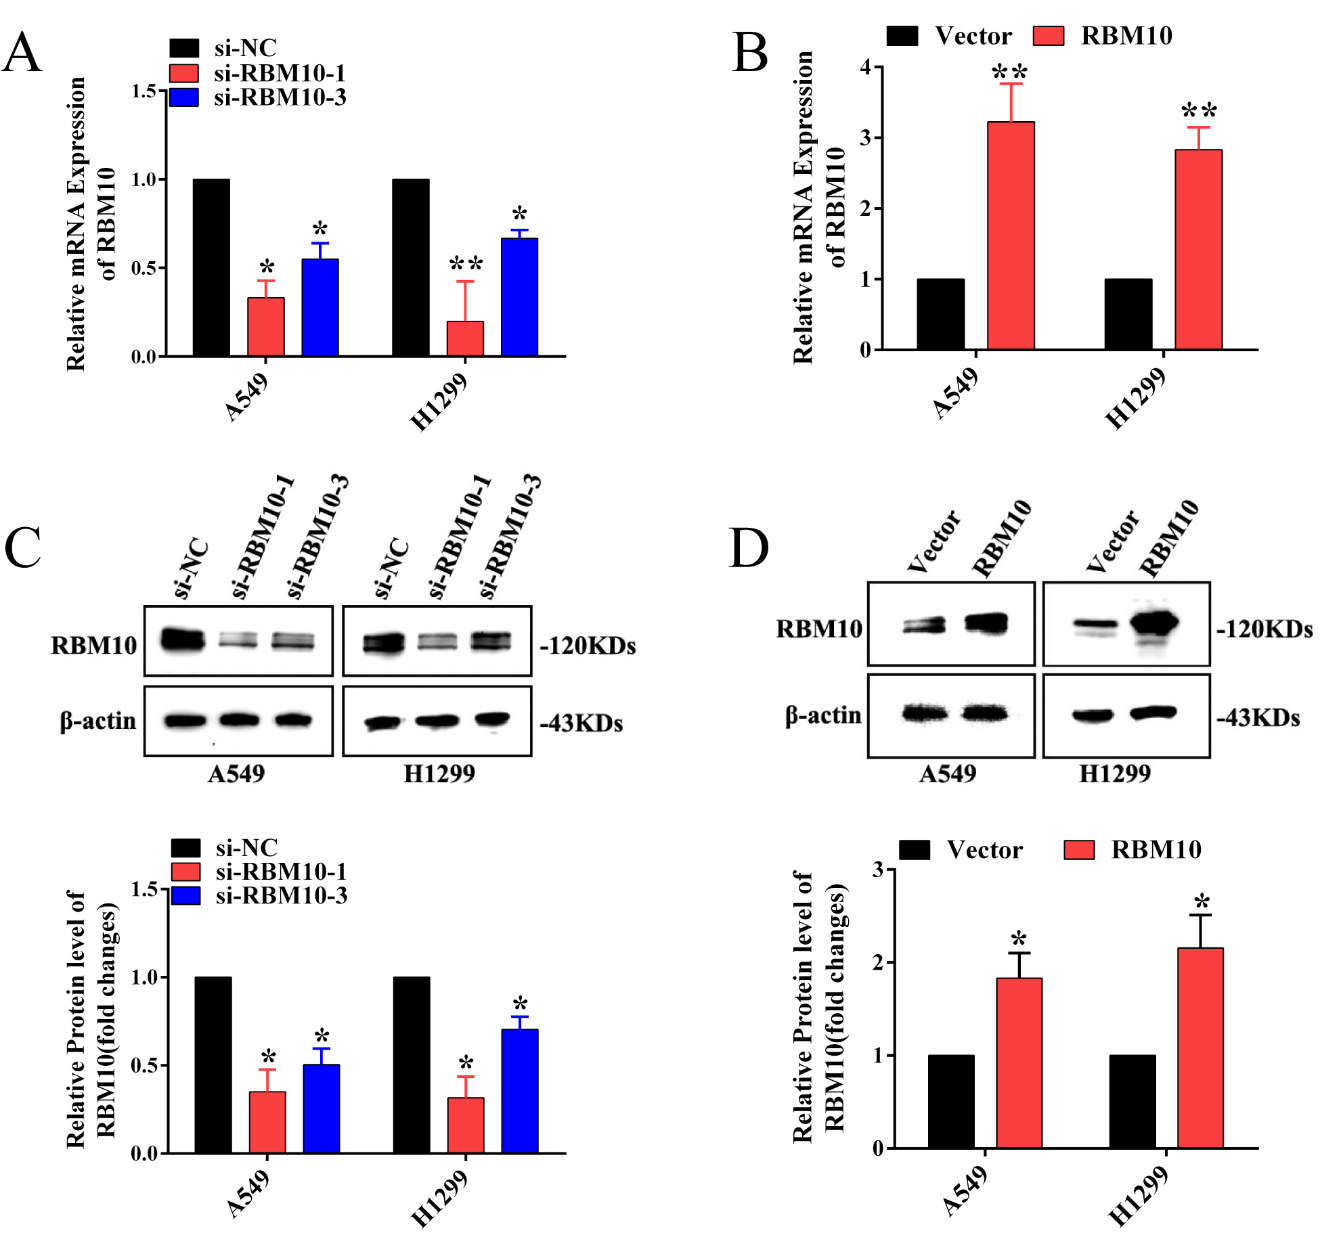
**

**Additional file 1: Figure S1** Verification of transfection efficiency qRT-PCR and Western blot analysis of RBM10 mRNA and protein expression in A549 or H1299 cell lines transfected with RBM10 si-RNA-1/-3 and si-NC, and the same cell lines infected with RBM10 overexpression lentivirus (RBM10) and negative control (vector). GAPDH was applied as the endogenous control for qRT-PCR, and β-actin was used as a loading control for western blot assay. The results were represented as mean ± SD. *P < 0.05, **P < 0.01.


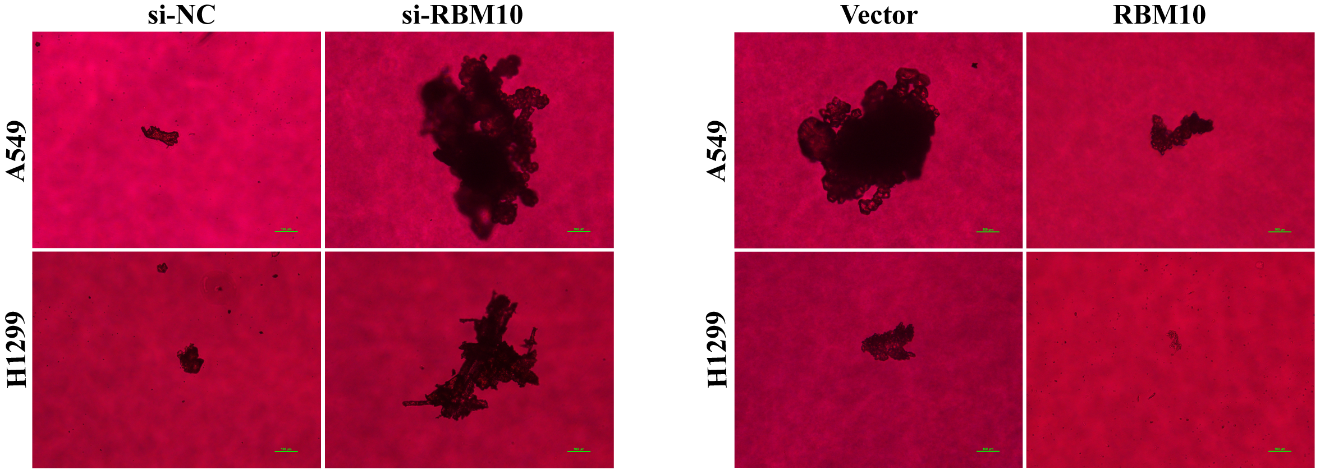


**Additional file 1: Figure S2** Soft agar colony formation assays using the transfected cells. The scale bar is 100μm.


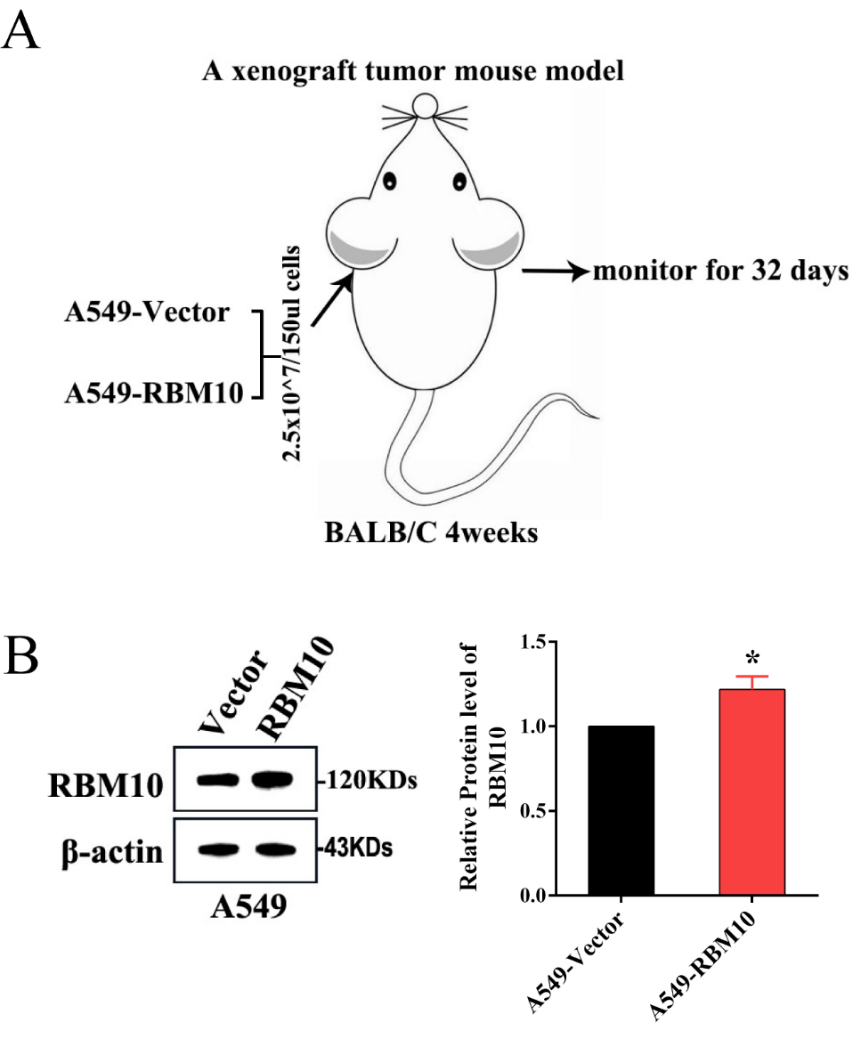


**Additional file 2: Figure S1** **(a)** Schematic diagram of subcutaneous xenograft model in BALB/c nude mice**. (b)** Stable overexpression of RBM10 in A549 cells and the transfection efficiency were assessed by Western blot.


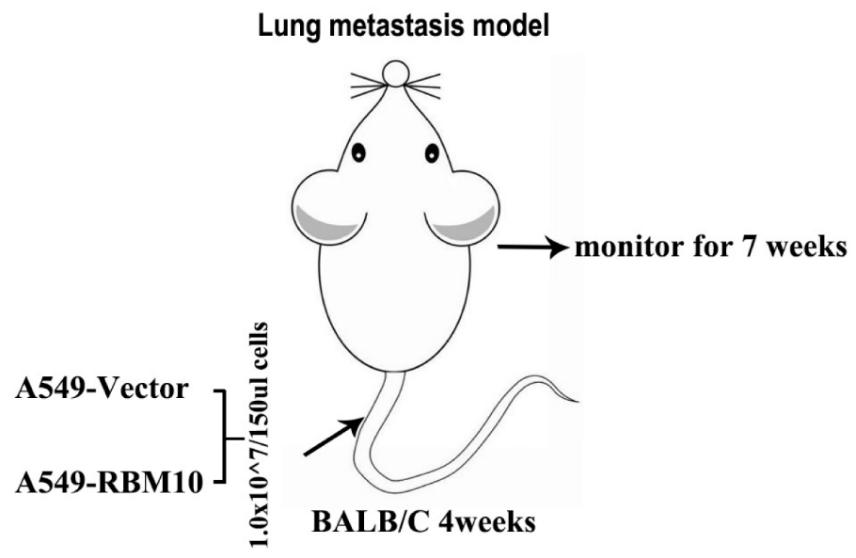


**Additional file 2: Figure S2** Schematic diagram of lung metastasis model in BALB/c nude mice.


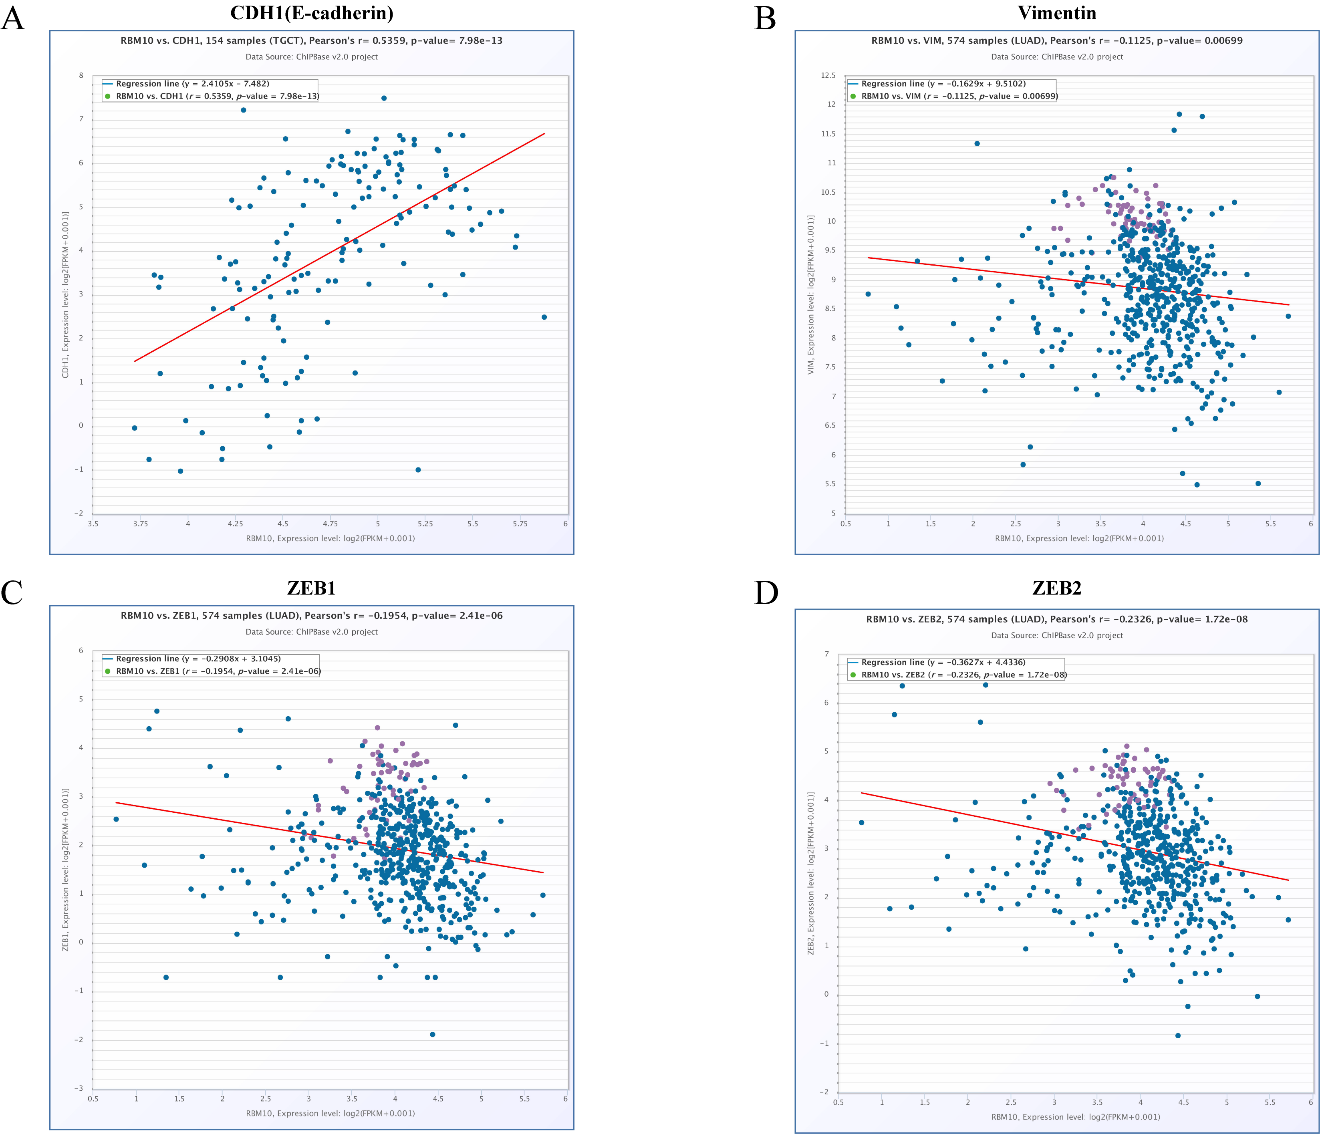


**Additional file 3: Figure S1** The expression relationship between RBM10 and CDH1 (E-cadherin), Vimentin, ZEB1, ZEB2 in LUAD in published database from ChipBase (<http://deepbase.sysu.edu.cn/chipbase/>).


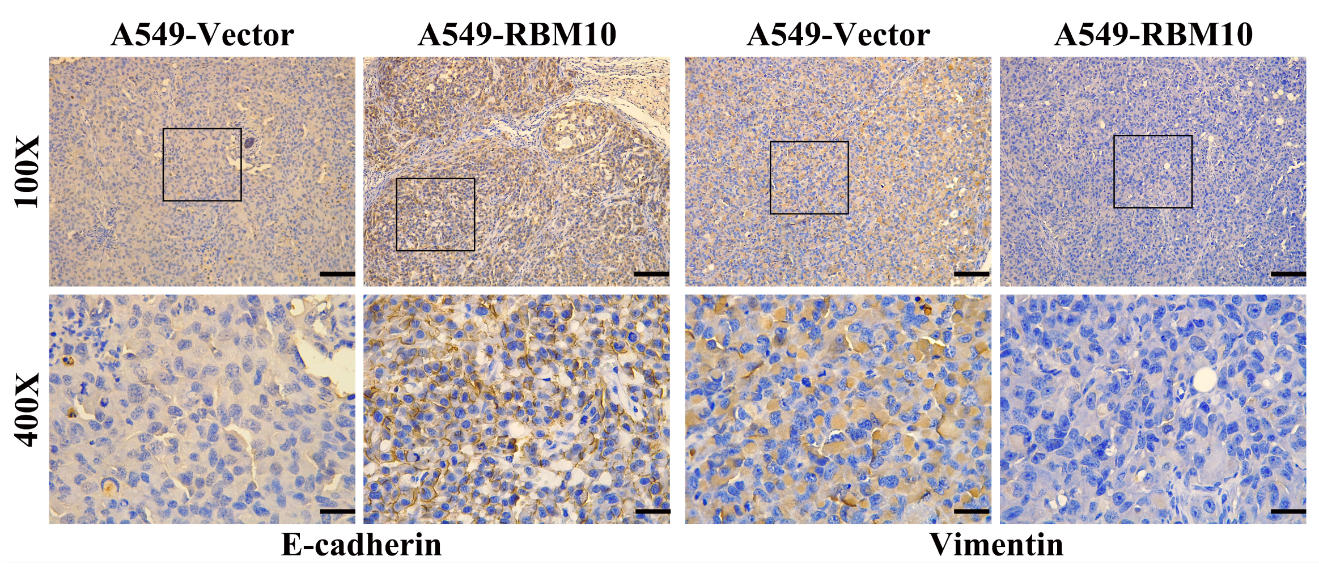


**Additional file 3: Figure S2** IHC staining of EMT markers (E-cadherin, Vimentin) in xenograft tumors.


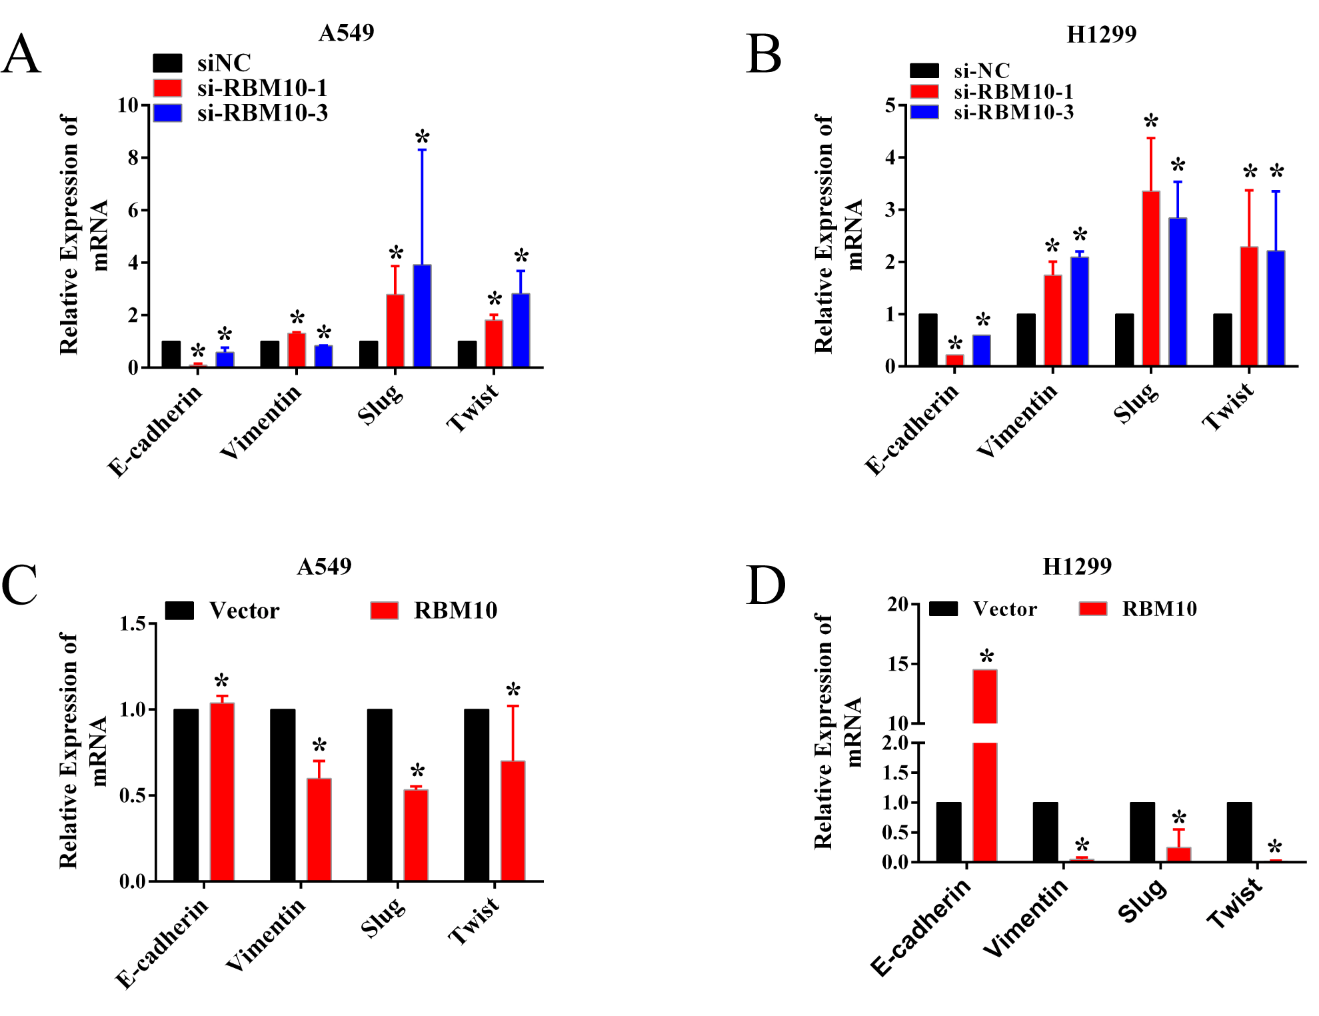


**Additional file 3: Figure S3** qRT-PCR results of the EMT markers (E-cadherin, Vimentin, slug, twist) in A549 or H1299 cells with knockdown or overexpressing RBM10. The results were represented as mean ± SD. *P<0.05


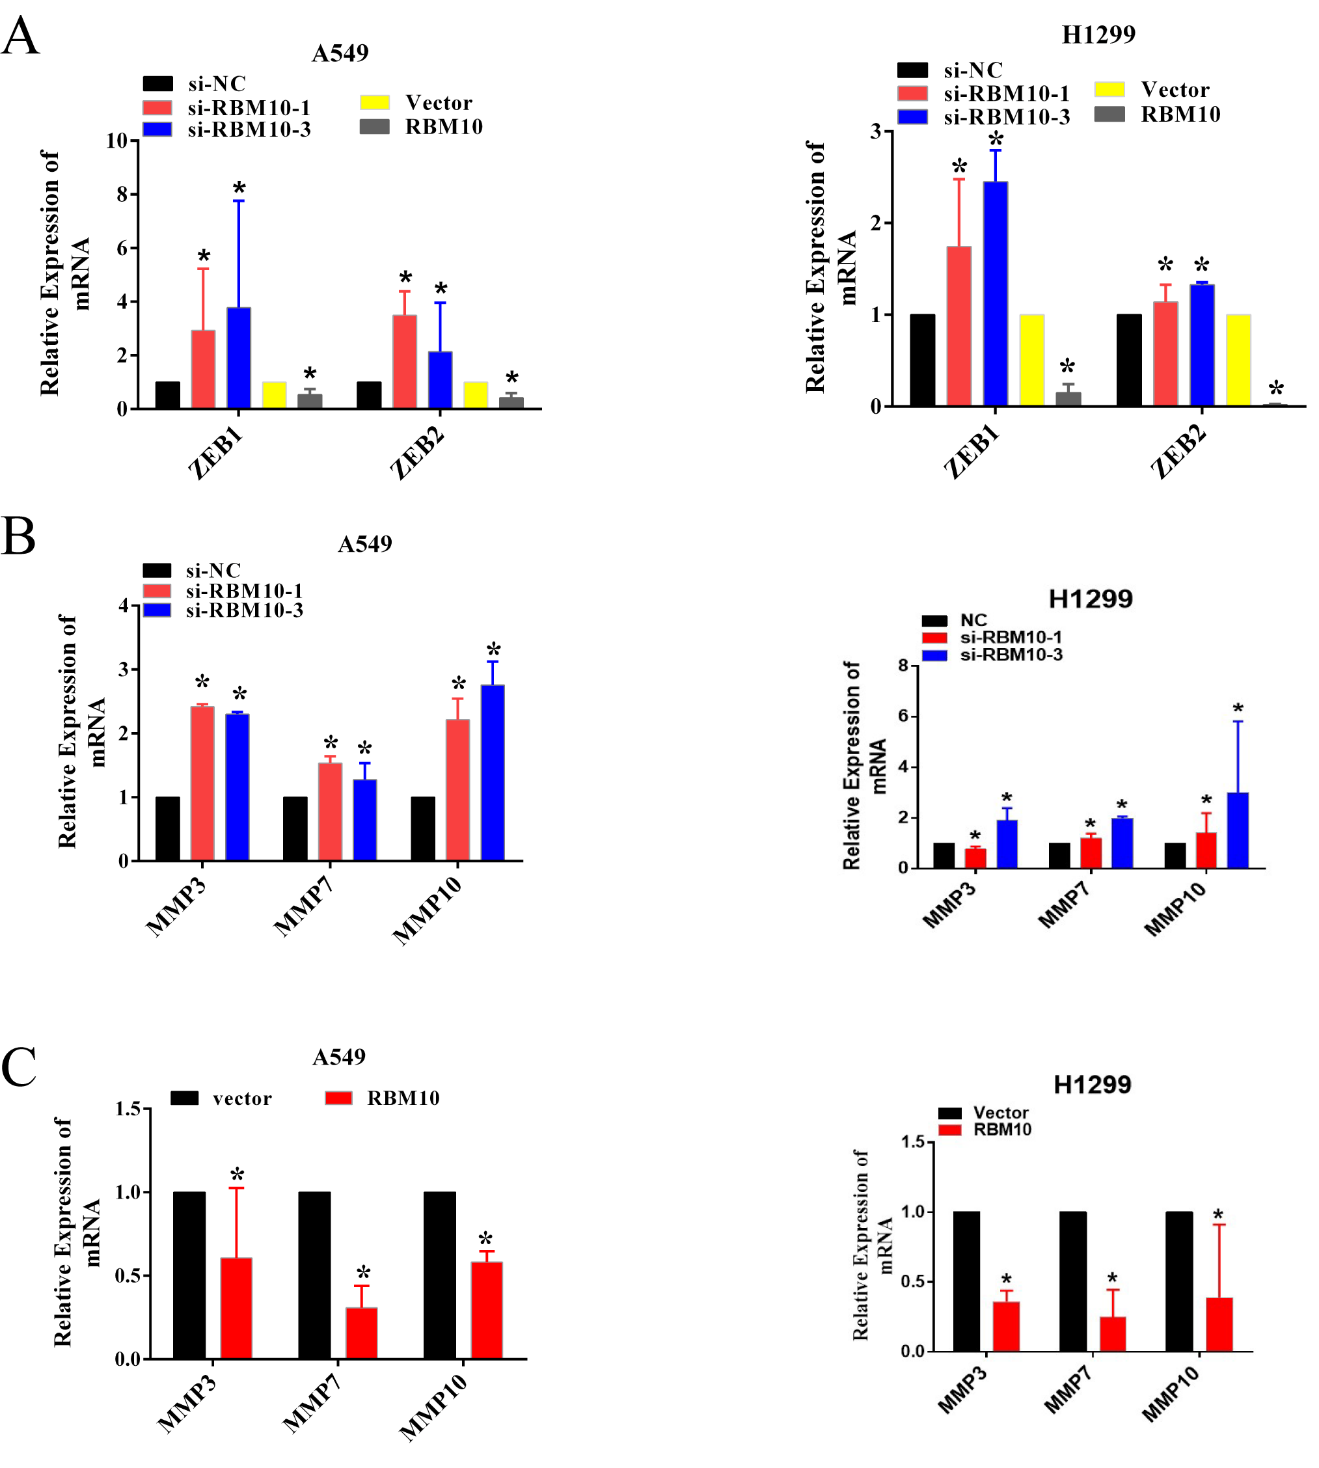


**Additional file 3: Figure S4** The mRNA levels of ZEB1, ZEB2, MMP3, MMP7 and MMP10 in LUAD cells by qRT-PCR. The results were represented as mean ± SD. *P<0.05


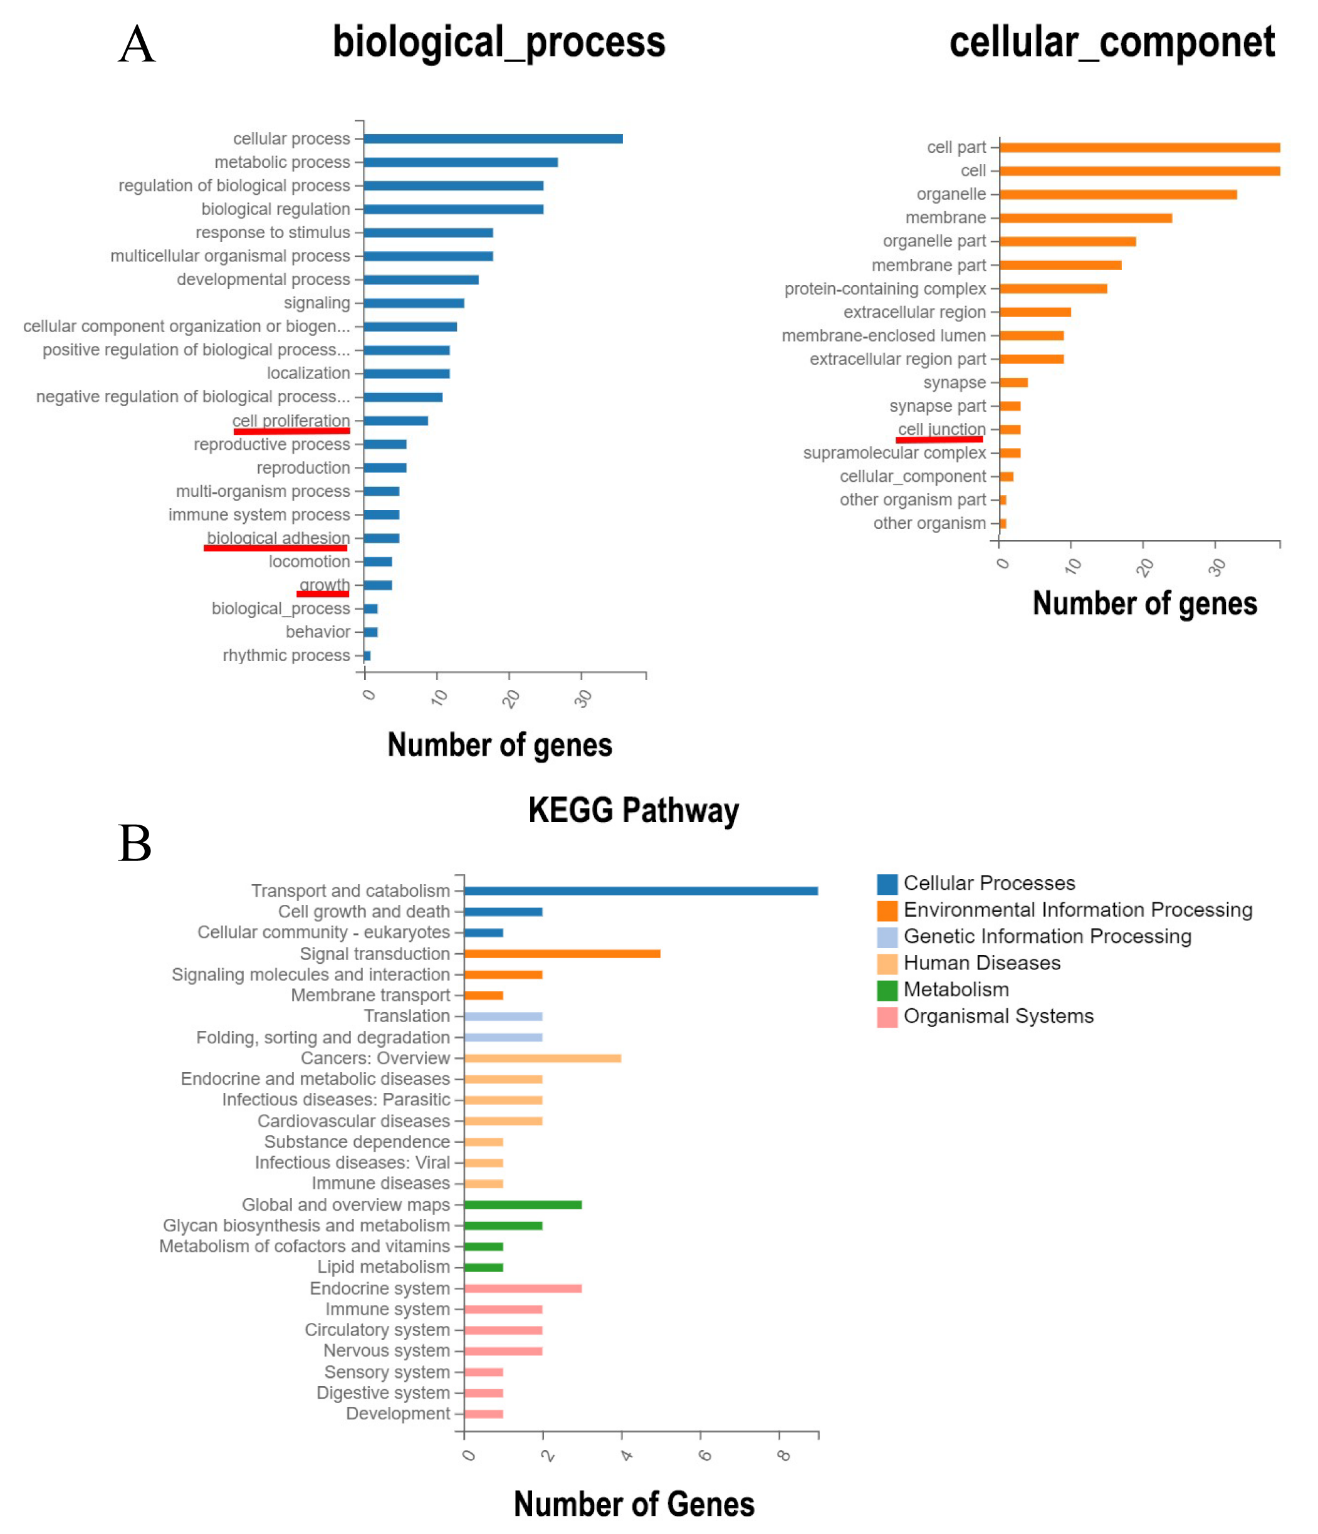


**Additional file 4: Figure S1** Gene ontology (GO) analysis and KEGG analysis of RBM10-dependent genes. (a) Gene ontology (GO) analysis involved biological processes (left) such as biological adhesion, cell proliferation and growth, and cellular component (right), including cell junction. (b) KEGG analysis was significantly associated with cancer-related functions, including cellular motility, growth and death and etc.


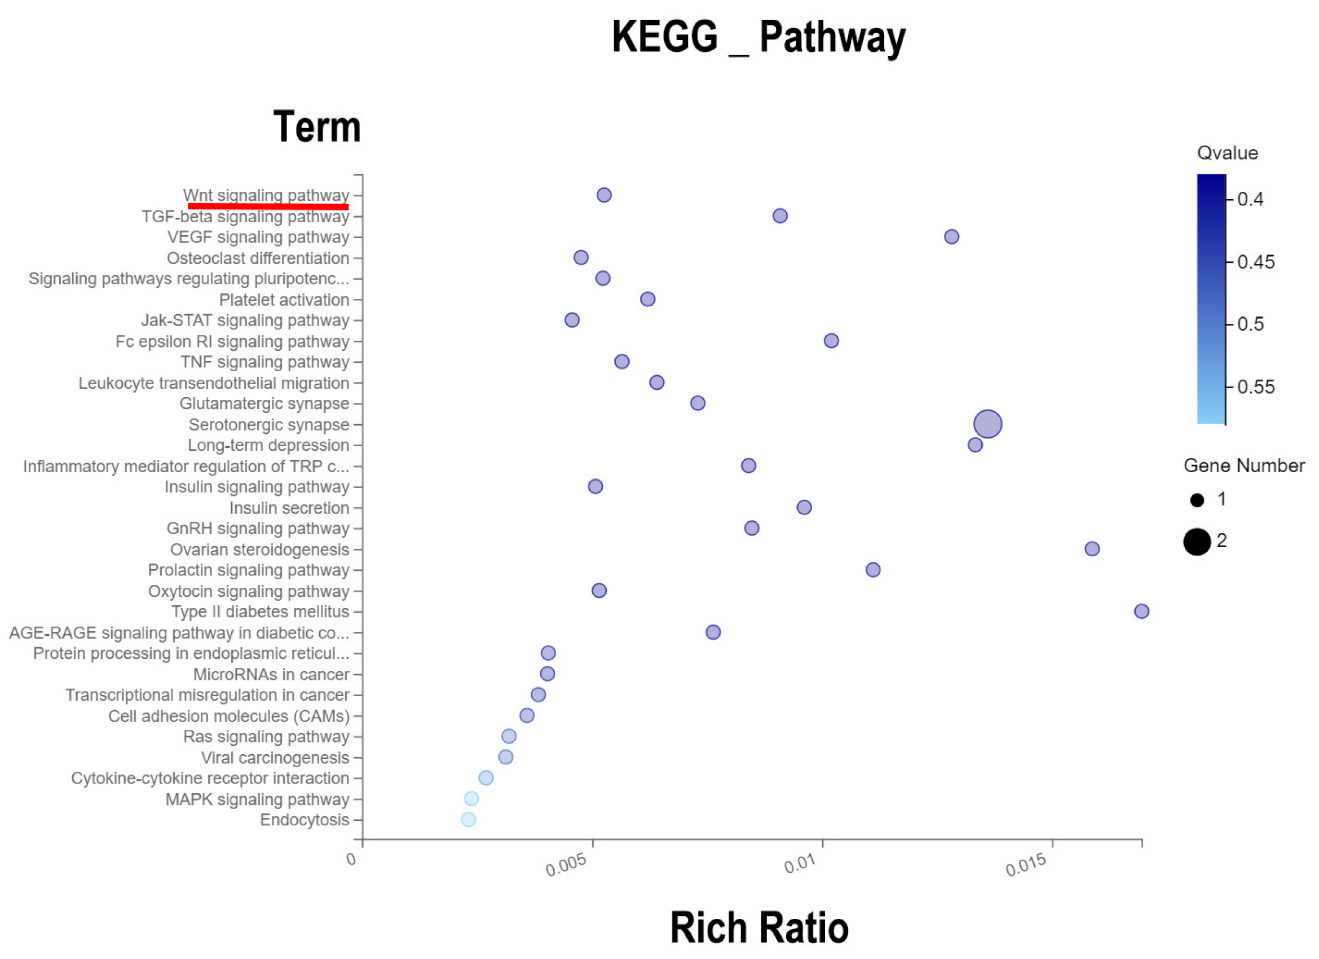


**Additional file 4: Figure S2** Pathway analysis of genes that were significantly and differentially expressed in H1299-si-RBM10 cells and control cells using KEGG database.


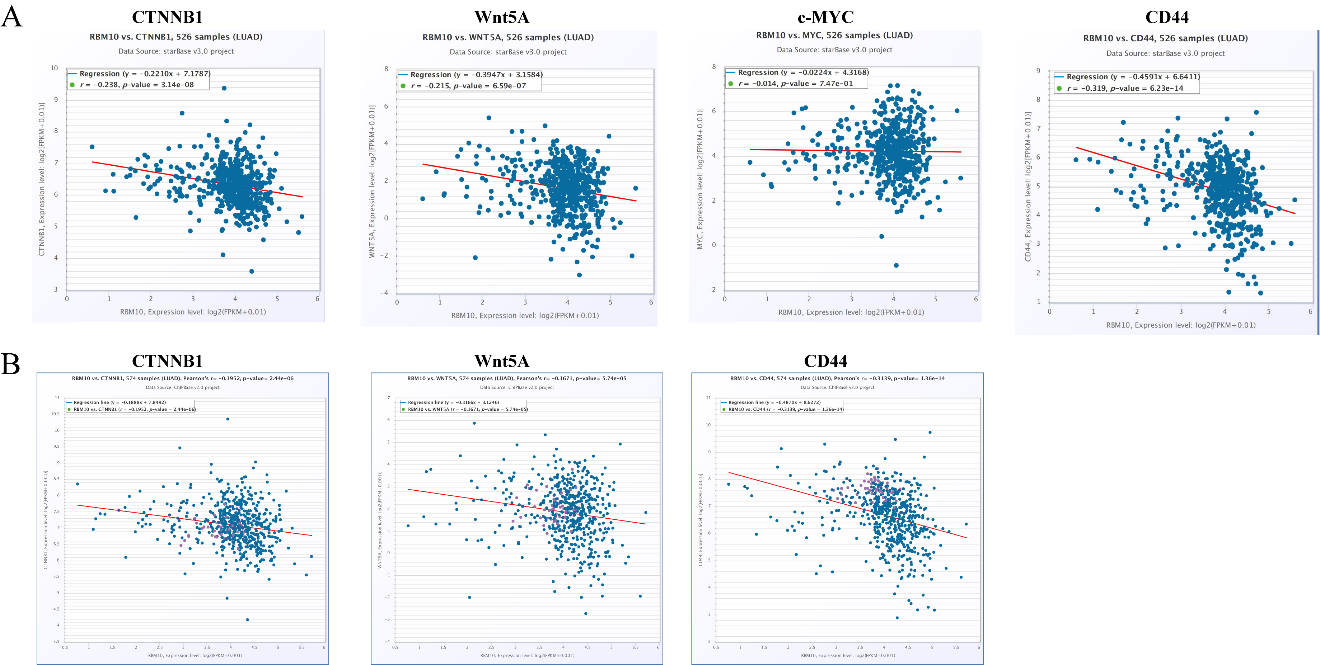


**Additional file 4: Figure S3** Negative correlation between RBM10 and the four common of the Wnt/β-catenin pathway target genes (CTNNB1 (also called β-catenin), Wnt5a, c-MYC, and CD44) in LUAD, analyzed at the ChipBase and StarBase.


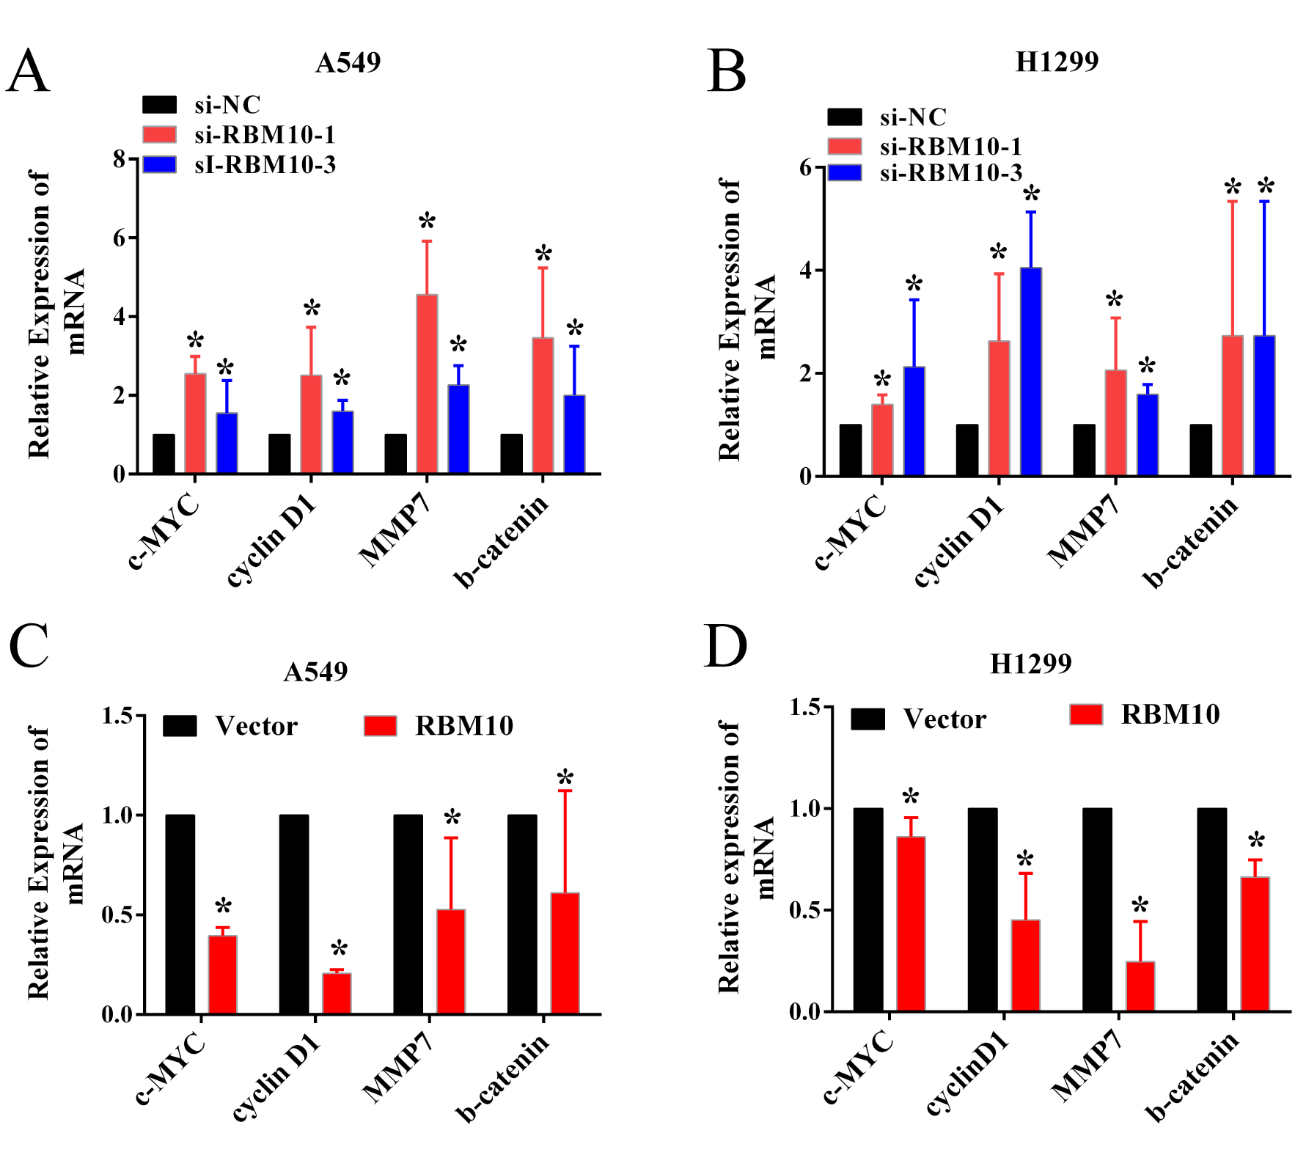


**Additional file 4: Figure S4** The effect of RBM10 knockdown (a, b) or overexpression (c, d) on the mRNA levels of β-catenin, cyclin-D1, c-MYC and MMP7 in LUAD cells assayed by qRT-PCR.


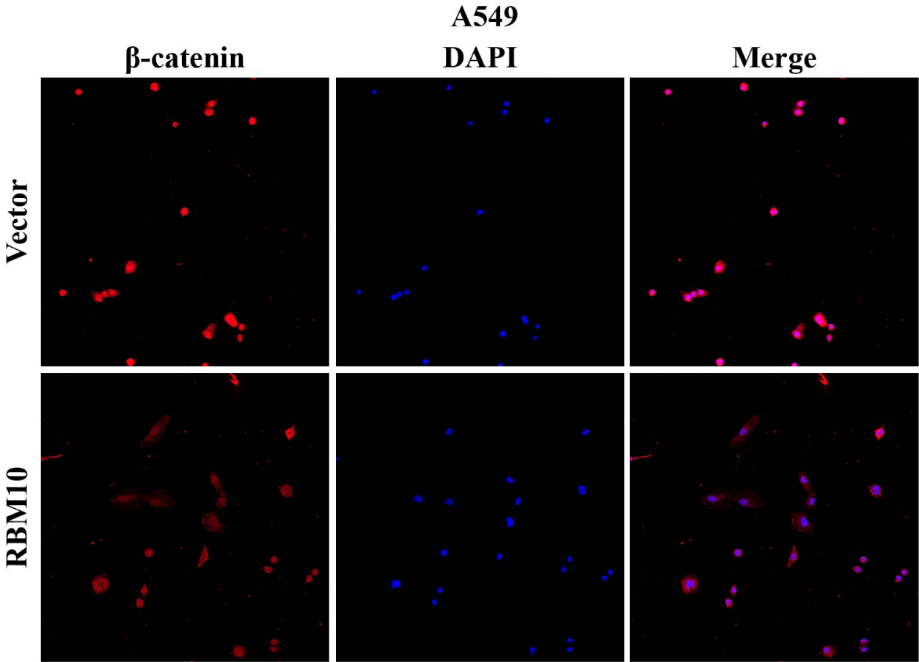


**Additional file 4: Figure S5** IF assay results of β-catenin in RBM10-overexpressing A549 cells.


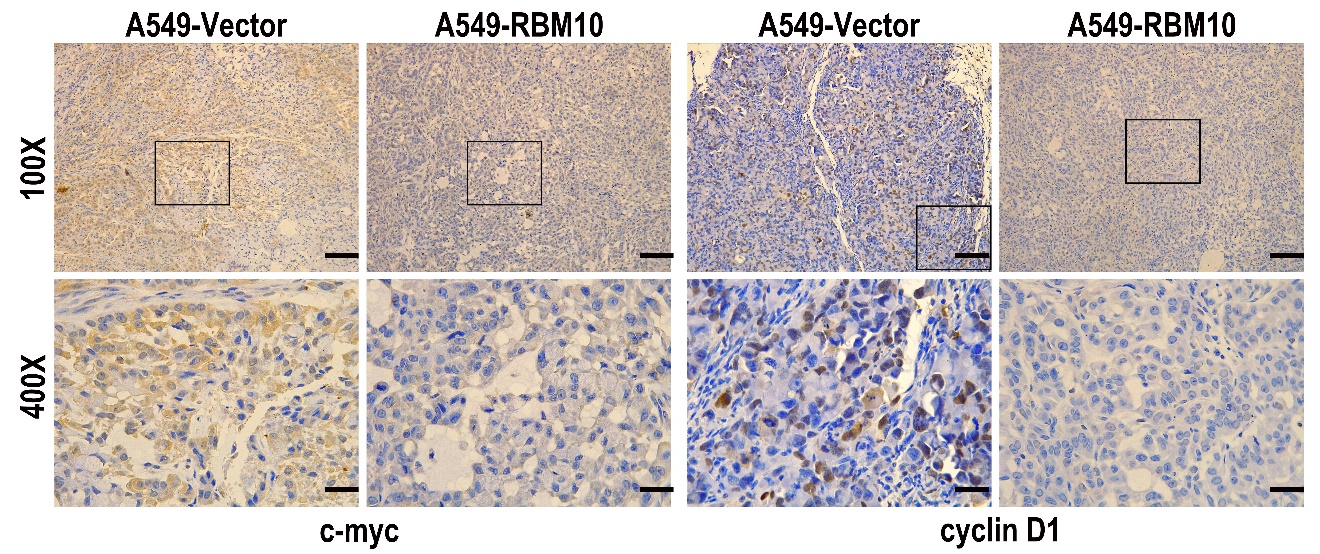


**Additional file 4: Figure S6** The expression of c-MYC and cyclinD1 were examined by IHC staining in the xenograft tumor tissues.


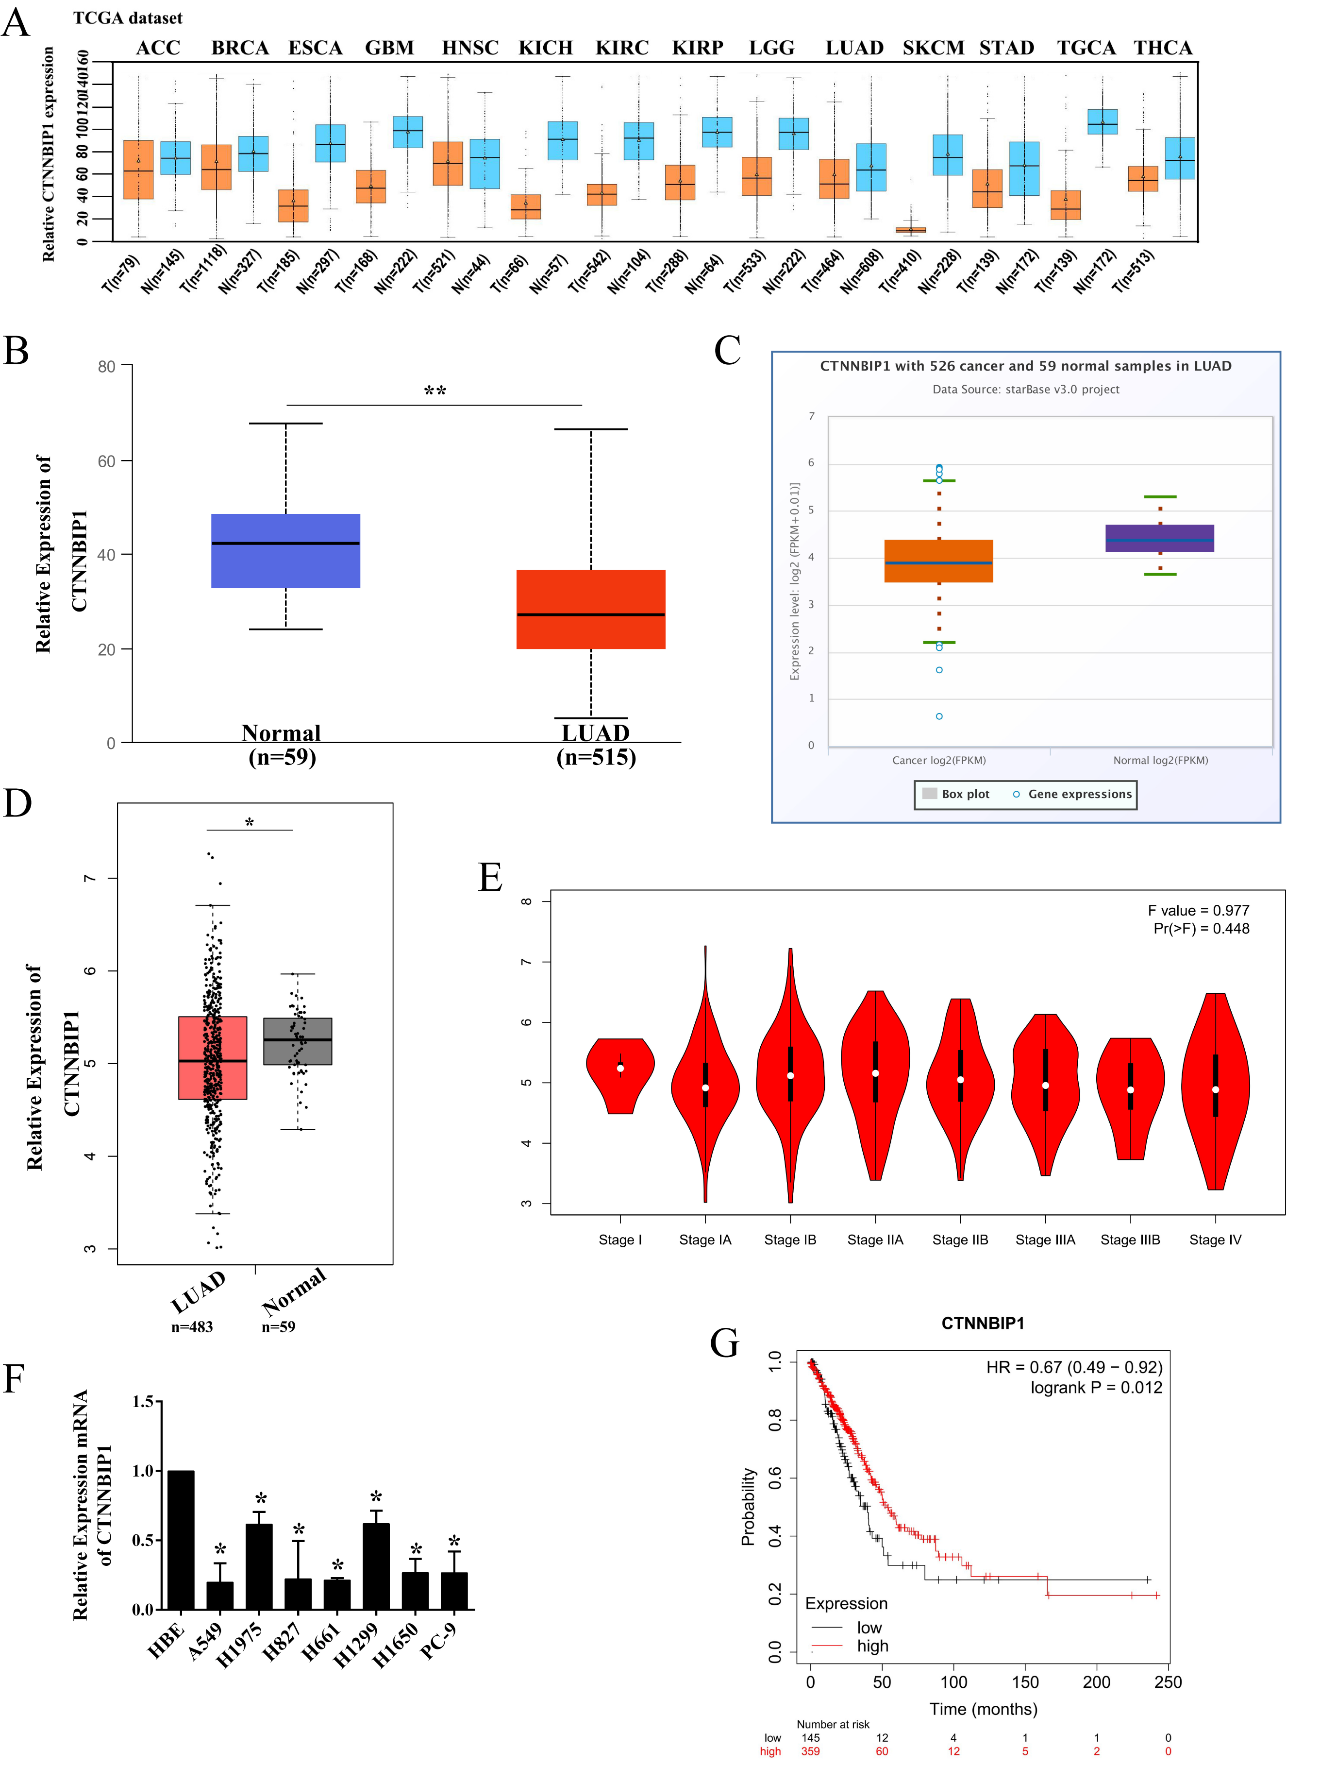


**Additional file 5: Figure S1** CTNNBIP1 is the low expression in LUAD (a) The expression of CTNNBIP1 in [various](file:///C:\AppData\Local\Microsoft\Windows\INetCache\Content.Outlook\AppData\Local\Packages\microsoft.windowscommunicationsapps_8wekyb3d8bbwe\LocalState\apple\AppData\Local\youdao\dict\Application\8.9.6.0\resultui\html\index.html#/javascript:;) tumors was observed from TCGA databases. (b, c) the expression of CTNNBIP1 in LUAD was reported from UALCAN and StarBase website. (d) The CTNNBIP1 mRNA levels in LUAD were obtained from GEPIA. (e) Box plots showed that expression levels of CTNNBIP1 were gradually reduced with clinical stage progression. (f) qRT-PCR analysis of CTNNBIP1 mRNA levels in a series of LUAD cell lines and the control cell lines HBE. (g) The OS analysis of 504 LUAD patients in KM Plotter database. The results were represented as mean ± SD. *P < 0.05, all experiments were repeated three times.


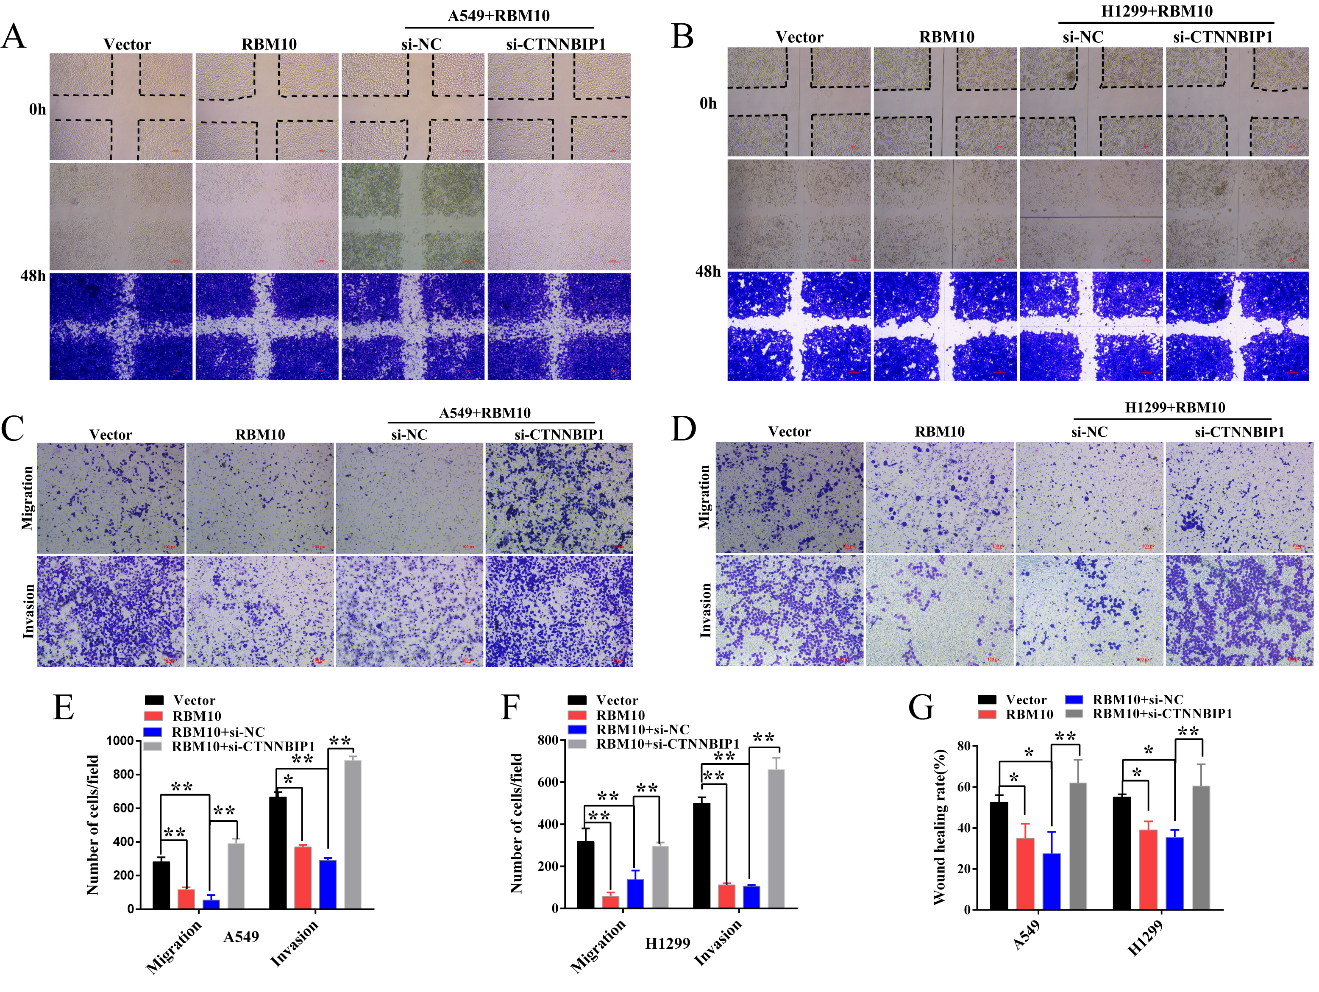


**Additional file 5: Figure S2** After transfection with CTNNBIP1 siRNA1 in stable RBM10 for 48 h, the cell migration, and invasion ability were estimated by Transwell assays. The results were represented as mean ± SD. *P < 0.05, **p<0.01, all experiments were repeated three times.
